# Supplementary material for: Exploring the Potential of Heterosis to Improve Nitrogen Use Efficiency in Popcorn Plants
Source: MDPI journal article supplement (doi:10.3390/plants12112135), 2023-05-28
Supplement: s1 [file s1]

**Supplementary Table S1.** Principal component analysis (PCA) for 28 morpho-agronomic and physiological traits evaluated in popcorn genotypes under contrasting nitrogen (N) availability.

| Principal component | Eigenvalue | Variance (%) | Cumulative variance (%) |
|---------------------|------------|--------------|-------------------------|
| <b>High N</b>       |            |              |                         |
| 1                   | 14.78      | 52.80        | 52.80                   |
| 2                   | 9.04       | 32.30        | 85.10                   |
| 3                   | 4.17       | 14.90        | 100.00                  |
| <b>Low N</b>        |            |              |                         |
| 1                   | 12.50      | 44.64        | 44.64                   |
| 2                   | 10.10      | 36.06        | 80.70                   |
| 3                   | 5.40       | 19.30        | 100.00                  |

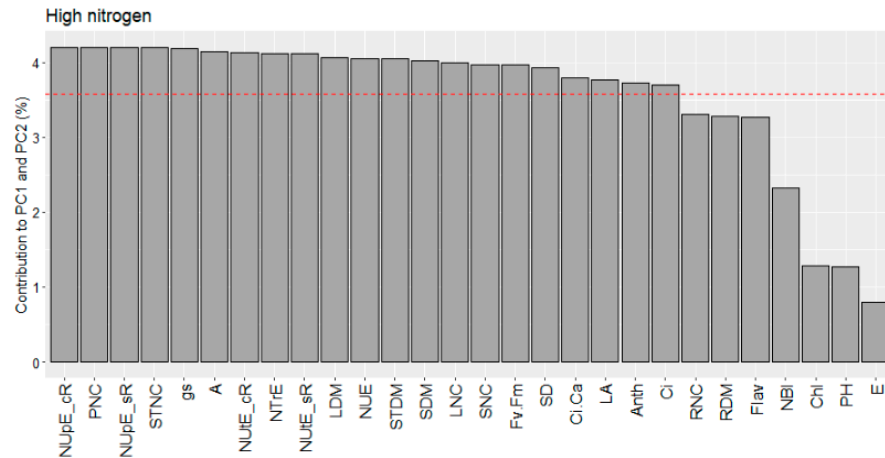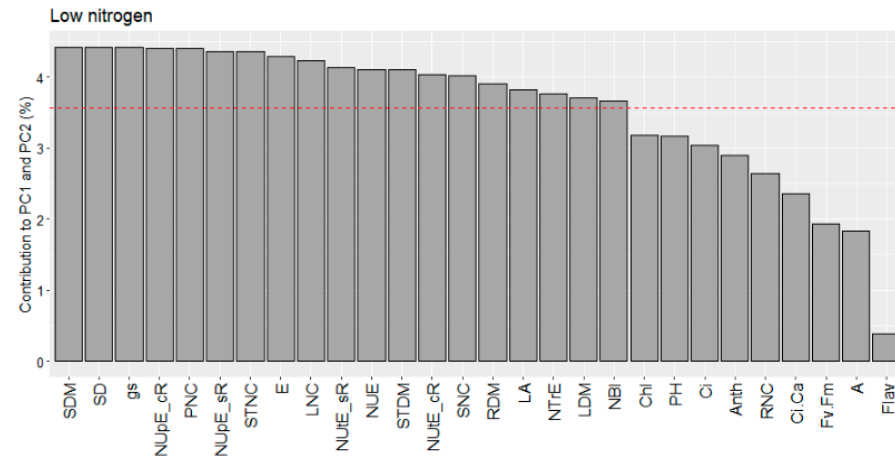

**Supplementary Figure S1.** Relative contribution of 28 morpho-agronomic and physiological traits evaluated in popcorn genotypes under contrasting nitrogen (N) availability to the first 2 Principal Components. The red line indicates the average contribution. PH – plant height (cm); SD – stem diameter (mm); LA – leaf area (cm<sup>2</sup>); LDM – leaf dry matter (g); SDM – stem dry matter (g); STDM – shoot dry matter (g); RDM – root dry matter (g); LNC – leaf N content (mg of N kg<sup>-1</sup>); SNC – stem N content (mg of N kg<sup>-1</sup>); RNC – root N content (mg of N kg<sup>-1</sup>); STNC – shoot N content (mg of N kg<sup>-1</sup>); PNC – plant N content (mg of N kg<sup>-1</sup>); (NUE – N use efficiency; NUtE\_cR – N uptake efficiency with root N content; NUtE\_sR – N uptake efficiency without root N content; NUtE\_cR – N utilization efficiency with the content of N in the root; NUtE\_sR – N utilization efficiency without the content of N in the root; NTrE – N translocation efficiency; A – net CO<sub>2</sub> assimilation rate; gs – stomatal conductance; Ci – intercellular concentration of CO<sub>2</sub>; E – transpiration rate; Ci/Ca – ratio between the intercellular and external concentration of CO<sub>2</sub>; Fv/Fm – photochemical efficiency of photosystem II; Chl – relative chlorophyll content; Flav – relative content of flavonoids; Anth – relative anthocyanin content; NBI – nitrogen balance index.

**Supplementary Table S2.** R<sup>2</sup> statistics to test the proportional contribution of each source of variation in 28 morpho-agronomic and physiological traits evaluated in popcorn genotypes under contrasting nitrogen (N) availability.

| Trait   | Sum of Squares |            |           |            | R <sup>2</sup> statistics   |                             |                               |
|---------|----------------|------------|-----------|------------|-----------------------------|-----------------------------|-------------------------------|
|         | G              | N          | G × N     | Total      | R <sup>2</sup> <sub>G</sub> | R <sup>2</sup> <sub>N</sub> | R <sup>2</sup> <sub>G×N</sub> |
| PH      | 1351.56        | 166.35     | 610.74    | 2128.64    | <b>0.635</b>                | 0.078                       | 0.287                         |
| SD      | 112.27         | 294.39     | 54.76     | 461.41     | 0.243                       | <b>0.638</b>                | 0.119                         |
| LA      | 46743.95       | 83920.25   | 28458.37  | 159122.57  | 0.294                       | <b>0.527</b>                | 0.179                         |
| LDM     | 51.28          | 131.37     | 27.61     | 210.26     | 0.244                       | <b>0.625</b>                | 0.131                         |
| SDM     | 33.27          | 42.75      | 19.42     | 95.44      | 0.349                       | <b>0.448</b>                | 0.203                         |
| STDM    | 158.28         | 324.06     | 81.33     | 563.67     | 0.281                       | <b>0.575</b>                | 0.144                         |
| RDM     | 5.51           | 2.84       | 3.46      | 11.82      | <b>0.467</b>                | 0.241                       | 0.293                         |
| LNC     | 582.17         | 2322.93    | 432.16    | 3337.27    | 0.174                       | <b>0.696</b>                | 0.129                         |
| SNC     | 585.31         | 2722.78    | 471.36    | 3779.45    | 0.155                       | <b>0.720</b>                | 0.125                         |
| RNC     | 126.22         | 258.19     | 136.31    | 520.72     | 0.242                       | <b>0.496</b>                | 0.262                         |
| STNC    | 1776.81        | 10075.55   | 1512.41   | 13364.76   | 0.133                       | <b>0.754</b>                | 0.113                         |
| PNC     | 2530.05        | 13559.60   | 2383.28   | 18472.93   | 0.137                       | <b>0.734</b>                | 0.129                         |
| NUE     | 825099.01      | 3563988.70 | 565939.84 | 4955027.55 | 0.167                       | <b>0.719</b>                | 0.114                         |
| NUpE_cR | 11.84          | 972.43     | 11.34     | 995.61     | 0.012                       | <b>0.977</b>                | 0.011                         |
| NUpE_sR | 8.82           | 570.26     | 7.92      | 587.00     | 0.015                       | <b>0.971</b>                | 0.014                         |
| NUtE_cR | 91009.80       | 32707.18   | 39096.94  | 162813.93  | <b>0.559</b>                | 0.201                       | 0.240                         |
| NUtE_sR | 57696.23       | 25439.84   | 22885.31  | 106021.37  | <b>0.544</b>                | 0.240                       | 0.216                         |
| NTrE    | 0.018          | 0.028      | 0.015     | 0.060      | 0.301                       | <b>0.458</b>                | 0.241                         |
| A       | 646.64         | 1250.61    | 466.58    | 2363.83    | 0.274                       | <b>0.529</b>                | 0.197                         |
| gs      | 0.087          | 0.149      | 0.078     | 0.314      | 0.277                       | <b>0.474</b>                | 0.249                         |
| Ci      | 21125.85       | 9564.15    | 16386.92  | 47076.93   | <b>0.449</b>                | 0.203                       | 0.348                         |
| E       | 8.79           | 4.91       | 13.31     | 27.02      | 0.326                       | 0.182                       | <b>0.493</b>                  |
| Ci/Ca   | 0.281          | 0.065      | 0.233     | 0.579      | <b>0.485</b>                | 0.112                       | 0.403                         |
| Fv/Fm   | 0.784          | 0.048      | 0.294     | 1.126      | <b>0.696</b>                | 0.043                       | 0.261                         |
| Chl     | 628.85         | 1273.00    | 364.44    | 2266.29    | 0.277                       | <b>0.562</b>                | 0.161                         |
| Flav    | 0.489          | 0.107      | 0.364     | 0.961      | <b>0.509</b>                | 0.111                       | 0.379                         |
| Anth    | 0.172          | 0.091      | 0.148     | 0.411      | 0.418                       | 0.221                       | 0.361                         |
| NBI     | 1118.23        | 4388.86    | 1208.65   | 6715.75    | 0.167                       | <b>0.654</b>                | 0.180                         |

Values in bold represents the ones with biggest contribution to their respective Sum of Square. R<sup>2</sup><sub>G</sub> – Genotypic contribution to the observed variation in genotypes; R<sup>2</sup><sub>N</sub> – Nitrogen condition contribution to the observed variation in genotypes; R<sup>2</sup><sub>G×N</sub> – Genotype by N interaction contribution to the observed variation in genotypes; PH – plant height (cm); SD – stem diameter (mm); LA – leaf area (cm<sup>2</sup>); LDM – leaf dry matter (g); SDM – stem dry matter (g); STDM – shoot dry matter (g); RDM – root dry matter (g); LNC – leaf N content (mg of N kg<sup>-1</sup>); SNC – stem N content (mg of N kg<sup>-1</sup>); RNC – root N content (mg of N kg<sup>-1</sup>); STNC – shoot N content (mg of N kg<sup>-1</sup>); PNC – plant N content (mg of N kg<sup>-1</sup>); NUE – nitrogen use efficiency; NUpE\_cR – nitrogen use efficiency in the canopy; NUpE\_sR – nitrogen use efficiency in the stem; NUtE\_cR – nitrogen use efficiency in the root; NUtE\_sR – nitrogen use efficiency in the shoot; NTrE – nitrogen use efficiency in the total; A – assimilation rate; gs – stomatal conductance; Ci – intercellular CO<sub>2</sub> concentration; E – transpiration rate; Ci/Ca – ratio of intercellular CO<sub>2</sub> concentration to atmospheric CO<sub>2</sub> concentration; Fv/Fm – maximum quantum yield of PSII; Chl – chlorophyll content; Flav – flavonoid content; Anth – anthocyanin content; NBI – nitrogen balance index.

– plant N content ( $\text{mg of N kg}^{-1}$ ); (NUE – N use efficiency; NUpE\_cR – N uptake efficiency with root N content; NUpE\_sR – N uptake efficiency without root N content; NUtE\_cR – N utilization efficiency with the content of N in the root; NUtE\_sR – N utilization efficiency without the content of N in the root; NTrE – N translocation efficiency; A – net CO<sub>2</sub> assimilation rate; gs – stomatal conductance; C<sub>i</sub> – intercellular concentration of CO<sub>2</sub>; E – transpiration rate; C<sub>i</sub>/C<sub>a</sub> – ratio between the intercellular and external concentration of CO<sub>2</sub>; F<sub>v</sub>/F<sub>m</sub> – photochemical efficiency of photosystem II; Chl – relative chlorophyll content; Flav – relative content of flavonoids; Anth – relative anthocyanin content; NBI – nitrogen balance index.

**Supplementary Table S3.** Analysis of variance and quadratic components for 28 characters evaluated in 16 popcorn genotypes under contrasting nitrogen conditions, according to the model proposed by Griffing (1956) for a diallel involving four lines, their F1s, and reciprocal hybrids.

| Trait   | High N condition          |         |       |                            |          |       |                   |          |       |                 | Low N condition |                           |            |       |                            |         |       |                   |          |       |                 |      |
|---------|---------------------------|---------|-------|----------------------------|----------|-------|-------------------|----------|-------|-----------------|-----------------|---------------------------|------------|-------|----------------------------|---------|-------|-------------------|----------|-------|-----------------|------|
|         | General combining ability |         |       | Specific combining ability |          |       | Reciprocal effect |          |       | Residual Effect |                 | General combining ability |            |       | Specific combining ability |         |       | Reciprocal effect |          |       | Residual Effect |      |
|         | MS                        | φg      | %     | MS                         | φs       | %     | MS                | φrc      | %     | Value           | %               | MS                        | φg         | %     | MS                         | φs      | %     | MS                | φrc      | %     | Value           | %    |
| PH      | **                        | 1.23    | 3.07  | **                         | 29.568   | 73.88 | **                | 8.655    | 21.63 | 0.571           | 1.43            | **                        | 5.652171   | 15.39 | **                         | 27.9612 | 76.12 | **                | 3.077    | 8.38  | 0.0401          | 0.11 |
| SD      | **                        | 0.398   | 10.94 | **                         | 1.340    | 36.84 | **                | 1.871    | 51.43 | 0.029           | 0.79            | **                        | 0.237307   | 14.31 | **                         | 1.2087  | 72.87 | **                | 0.208    | 12.51 | 0.005           | 0.31 |
| LA      | **                        | 62.333  | 1.92  | **                         | 1593.713 | 49.01 | **                | 1594.055 | 49.02 | 1.521           | 0.05            | **                        | 73.668031  | 8.17  | **                         | 368.207 | 40.86 | **                | 458.840  | 50.91 | 0.505           | 0.06 |
| LDM     | **                        | 0.124   | 5.11  | **                         | 1.428    | 58.82 | **                | 0.868    | 35.75 | 0.008           | 0.32            | **                        | 0.05285    | 12.19 | **                         | 0.25636 | 59.12 | **                | 0.124    | 28.58 | 0.001           | 0.12 |
| SDM     | **                        | 0.051   | 2.96  | **                         | 1.080    | 63.14 | **                | 0.578    | 33.77 | 0.002           | 0.12            | **                        | 0.047863   | 15.74 | **                         | 0.21709 | 71.39 | **                | 0.039    | 12.75 | 0.0004          | 0.13 |
| STDM    | **                        | 0.296   | 3.85  | **                         | 4.813    | 62.57 | **                | 2.578    | 33.51 | 0.006           | 0.07            | **                        | 0.195236   | 14.82 | **                         | 0.87192 | 66.17 | **                | 0.250    | 18.95 | 0.001           | 0.07 |
| RDM     | **                        | 0.017   | 8.34  | **                         | 0.095    | 46.22 | **                | 0.093    | 45.33 | 0.000           | 0.12            | **                        | 0.006572   | 6.25  | **                         | 0.07285 | 69.34 | **                | 0.024    | 22.40 | 0.002           | 2.01 |
| LNC     | **                        | 0.606   | 3.02  | **                         | 7.141    | 35.52 | **                | 12.204   | 60.71 | 0.150           | 0.75            | **                        | 1.063573   | 6.79  | **                         | 11.1186 | 70.97 | **                | 3.409    | 21.76 | 0.076           | 0.49 |
| SNC     | **                        | 0.610   | 2.06  | **                         | 7.920    | 26.74 | **                | 21.049   | 71.06 | 0.041           | 0.14            | **                        | 0.14854    | 2.72  | **                         | 4.40964 | 80.79 | **                | 0.391    | 7.17  | 0.509           | 9.32 |
| RNC     | **                        | 0.053   | 0.79  | **                         | 1.417    | 21.17 | **                | 5.144    | 76.83 | 0.081           | 1.21            | **                        | 0.066015   | 3.43  | **                         | 1.33766 | 69.50 | **                | 0.484    | 25.15 | 0.037           | 1.92 |
| STNC    | **                        | 1.974   | 2.23  | **                         | 23.528   | 26.60 | **                | 62.721   | 70.92 | 0.213           | 0.24            | **                        | 1.109277   | 16.42 | **                         | 1.10928 | 16.42 | **                | 4.057    | 60.07 | 0.479           | 7.08 |
| PNC     | **                        | 2.688   | 2.09  | **                         | 24.826   | 19.29 | **                | 100.884  | 78.40 | 0.286           | 0.22            | **                        | 1.065882   | 4.16  | **                         | 17.4982 | 68.26 | **                | 6.618    | 25.81 | 0.454           | 1.77 |
| NUE     | **                        | 98.204  | 3.85  | **                         | 1597.262 | 62.58 | **                | 854.874  | 33.50 | 1.857           | 0.07            | **                        | 6671.83936 | 14.82 | **                         | 29796.2 | 66.17 | **                | 8534.953 | 18.95 | 30.079          | 0.07 |
| NUPE_cR | **                        | 0.001   | 2.09  | **                         | 0.008    | 19.29 | **                | 0.033    | 78.40 | 0.000           | 0.22            | **                        | 0.036425   | 4.16  | **                         | 0.59797 | 68.26 | **                | 0.226    | 25.81 | 0.016           | 1.77 |
| NUpE_sR | **                        | 0.001   | 2.23  | **                         | 0.008    | 26.60 | **                | 0.021    | 70.92 | 0.000           | 0.24            | **                        | 0.037908   | 6.03  | **                         | 0.43536 | 69.30 | **                | 0.139    | 22.07 | 0.016           | 2.60 |
| NUtE_cR | **                        | 105.270 | 3.15  | **                         | 2320.839 | 69.52 | **                | 908.248  | 27.21 | 4.047           | 0.12            | **                        | 212.348923 | 13.36 | **                         | 926.23  | 58.28 | **                | 441.565  | 27.78 | 9.129           | 0.57 |
| NUtE_sR | **                        | 68.231  | 3.32  | **                         | 1364.550 | 66.33 | **                | 622.231  | 30.25 | 2.267           | 0.11            | **                        | 132.646943 | 14.06 | **                         | 555.281 | 58.87 | **                | 252.243  | 26.74 | 3.090           | 0.33 |
| NTrE    | **                        | 0.000   | 0.15  | **                         | 0.001    | 77.79 | **                | 0.000    | 19.64 | 0.000           | 2.42            | **                        | 0.000069   | 9.56  | **                         | 0.00051 | 71.19 | **                | 0.000    | 13.71 | 0.000           | 5.54 |
| A       | **                        | 3.498   | 15.23 | **                         | 14.252   | 62.05 | **                | 4.691    | 20.42 | 0.528           | 2.30            | **                        | 0.877728   | 6.09  | **                         | 6.31668 | 43.81 | **                | 6.799    | 47.15 | 0.426           | 2.95 |
| gs      | **                        | 0.001   | 12.74 | **                         | 0.002    | 62.30 | **                | 0.001    | 17.81 | 0.000           | 7.14            | **                        | 0.000012   | 0.62  | **                         | 0.00072 | 36.89 | **                | 0.001    | 54.95 | 0.000           | 7.54 |
| Ci      | **                        | 31.309  | 5.51  | **                         | 317.204  | 55.82 | **                | 149.046  | 26.23 | 70.707          | 12.44           | **                        | 37.472719  | 4.29  | **                         | 530.076 | 60.65 | **                | 299.354  | 34.25 | 7.109           | 0.81 |
| E       | **                        | 0.046   | 9.76  | **                         | 0.252    | 53.20 | **                | 0.161    | 33.97 | 0.015           | 3.08            | **                        | 0.019869   | 7.03  | **                         | 0.14199 | 50.25 | **                | 0.115    | 40.61 | 0.006           | 2.11 |

|              |    |       |       |    |        |       |    |        |       |          |       |    |          |      |    |         |       |    |       |       |        |       |
|--------------|----|-------|-------|----|--------|-------|----|--------|-------|----------|-------|----|----------|------|----|---------|-------|----|-------|-------|--------|-------|
| <b>Ci/Ca</b> | ** | 0.000 | 5.95  | ** | 0.004  | 58.46 | ** | 0.001  | 12.08 | 0.002    | 23.51 | ** | 0.001184 | 9.40 | ** | 0.00736 | 58.45 | ** | 0.004 | 28.94 | 0.0004 | 3.20  |
| <b>Fv/Fm</b> | ** | 0.000 | 4.28  | ** | 0.004  | 49.29 | ** | 0.003  | 40.57 | 0.000    | 5.86  | ** | 0.001564 | 5.28 | ** | 0.01483 | 50.11 | ** | 0.013 | 43.40 | 0.0004 | 1.21  |
| <b>Chl</b>   | ** | 0.363 | 1.30  | ** | 15.010 | 53.96 | ** | 10.727 | 38.56 | 1.716    | 6.17  | ** | 0.301963 | 2.30 | ** | 10.0824 | 76.82 | ** | 1.938 | 14.77 | 0.802  | 6.11  |
| <b>Flav</b>  | ** | 0.002 | 11.26 | ** | 0.010  | 49.42 | ** | 0.006  | 28.67 | 0.002    | 10.66 | ** | 0.000677 | 5.72 | ** | 0.00872 | 73.70 | ** | 0.002 | 19.96 | 0.0001 | 0.62  |
| <b>Anth</b>  | ** | 0.000 | 2.36  | ** | 0.000  | 59.84 | ** | 0.000  | 37.01 | 0.000003 | 0.79  | ns | -0.0002  | 0.00 | ns | -0.002  | 0.00  | ns | 0.002 | 7.26  | 0.020  | 92.74 |
| <b>NBI</b>   | ** | 3.389 | 4.89  | ** | 38.612 | 55.66 | ** | 14.388 | 20.74 | 12.988   | 18.72 | ** | 1.609887 | 6.10 | ** | 16.8048 | 63.65 | ** | 6.519 | 24.69 | 1.468  | 5.56  |

MS – Mean Square;  $\phi_g$ ,  $\phi_s$  and  $\phi_{rc}$  – quadratic component associated with general and specific combining abilities and reciprocal effects, respectively; PH – plant height (cm); SD – stem diameter (mm); LA – leaf area (cm<sup>2</sup>); LDM – leaf dry matter (g); SDM – stem dry matter (g); STDM – shoot dry matter (g); RDM – root dry matter (g); LNC – leaf N content (mg of N kg<sup>-1</sup>); SNC – stem N content (mg of N kg<sup>-1</sup>); RNC – root N content (mg of N kg<sup>-1</sup>); STNC – shoot N content (mg of N kg<sup>-1</sup>); PNC – plant N content (mg of N kg<sup>-1</sup>); NUE – N use efficiency; NUpE\_cR – N uptake efficiency with root N content; NUpE\_sR – N uptake efficiency without root N content; NUtE\_cR – N utilization efficiency with the N content of the root; NUtE\_sR – N utilization efficiency without the N content of the root; NTrE – N translocation efficiency; A – net CO<sub>2</sub> assimilation rate; gs – stomatal conductance; Ci – intercellular concentration of CO<sub>2</sub>; E – transpiration rate; Ci/Ca – ratio between the internal and external concentration of CO<sub>2</sub>; Fv/Fm – photochemical efficiency of photosystem II; Chl – relative chlorophyll content; Flav – relative flavonoid content; Anth – relative anthocyanin content; NBI – nitrogen balance index. Significance levels: \*  $p \leq 0.05$ ; \*\*  $p \leq 0.01$ ; and ns = not significant.

**Supplementary Table S4.** Chemical and particle-size analysis of the substrate used to evaluate four lines and 12 diallel popcorn hybrids under contrasting nitrogen conditions.

| Sample | pH               | S-SO <sub>4</sub>  | P | K   | Ca  | Mg                   | Al | Na  | H+Al | C                 | OM   | CEC                  | SB   | BS | m | NaSI | Fe    | Cu                 | Zn  | Mn   | B    | N    |
|--------|------------------|--------------------|---|-----|-----|----------------------|----|-----|------|-------------------|------|----------------------|------|----|---|------|-------|--------------------|-----|------|------|------|
|        | H <sub>2</sub> O | mg/dm <sup>3</sup> |   |     |     | mmol/dm <sup>3</sup> |    |     |      | g/dm <sup>3</sup> |      | mmol/dm <sup>3</sup> |      | %  | % | %    |       | mg/dm <sup>3</sup> |     |      |      | %    |
| 1      | 6.7              | 2                  | 8 | 0.6 | 7.9 | 1.9                  | 0  | 0.4 | 3.3  | 1.3               | 2.24 | 14.1                 | 10.8 | 77 | 0 | 3    | 217.2 | 0.12               | 2.3 | 33.6 | 0.33 | 0.18 |
| 2      | 6.7              | 2                  | 8 | 0.5 | 7.3 | 1.9                  | 0  | 0.7 | 4.1  | 1.3               | 2.24 | 15.5                 | 10.4 | 74 | 0 | 5    | 245.0 | 0.04               | 2.6 | 34.0 | 0.37 | 0.17 |
| 3      | 6.7              | 2                  | 8 | 0.6 | 7.6 | 1.9                  | 0  | 0.5 | 4    | 1.3               | 2.24 | 15                   | 10.6 | 75 | 0 | 5    | 230.0 | 0.10               | 2.5 | 33.0 | 0.38 | 0.17 |

**Extractors:** P, Na, K, Fe, Zn, Mn, Cu – Mehlich-1 Extractor; Ca, Mg, Al – KCl Extractor (1 mol/L); H + Al – Calcium Acetate Extractor (0.5 mol/L and pH 7.0); B – Hot water extractor; S – Monocalcium Phosphate Extractor. **Abbreviations:** SB – Sum of Exchangeable Bases; CEC – Cation Exchange Capacity at pH 7.0; BS – Base Saturation Index; m – Aluminum saturation index; NaSI – Sodium saturation index; and OM – Organic matter (C Org × 1,724, Walkley-Black
